# Supplementary material for: A High Temperature-Dependent Mitochondrial Lipase EXTRA GLUME1 Promotes Floral Phenotypic Robustness against Temperature Fluctuation in Rice (Oryza sativa L.)
Source: PLoS Genet. 2016 Jul 1;12(7):e1006152. doi: 10.1371/journal.pgen.1006152 (PMC4930220; doi:10.1371/journal.pgen.1006152)
Supplement: S7 Table — (XLSX) [file pgen.1006152.s021.xlsx]

## Sheet: Sheet1
		Table S7. Primers for genotyping the mutants.
		Mutant	Forward primer(5’-3’)	Reverse Primer(5’-3’)
		eg1	ATGACGCTCCCGAGGCAATG	TCAGATTAGCCCGAGCGTCTGCACCAAGCC
		nsr	ATGGGGAGGGGGAAGGTG	GATCGATGATGATGCGCTGCTGCGC
		osmads6-5	TGACAAGTTCAATCTTGTTGGTGCA	AAGACTTTGCAATGTCACGACTAGA (in deletion) /TTAATTATACCCGGCGCTGCCGAAC (after deletion)
		g1-ele	ATGTCGTCGTCGTCCGCTGCCGCGCTGGGC	CTAACTGAAGGTGTTGTACA
